# Supplementary material for: Annotated Bangla Natural Language Processing (BNLP) by using python or machine learning.
Source: Research Square preprint supplement (doi:10.21203/rs.3.rs-5101422/v1), 2024-10-09
Supplement: Supplementary file 1 [file 0104a4a34d2ef7a497c9f3f3.xlsx]

## Sheet: Sheet1
Sentences	POS Tagging	Sentiment	Actual Sentiment
শুভ নববর্ষ	[('শুভ', 'JJ'), ('নববর্ষ', 'NN')]	Positive	Positive
আজকের দিনটি খুব সুন্দর	[('আজকের', 'UND'), ('দিনটি', 'NN'), ('খুব', 'JJ'), ('সুন্দর', 'JJ')]	Positive	Positive
আমার প্রিয় খাবার বিরিয়ানি	[('আমার', 'PRP'), ('প্রিয়', 'JJ'), ('খাবার', 'NN'), ('বিরিয়ানি', 'NN')]	Positive	Positive
আমি তোমাকে ভালোবাসি	[('আমি', 'PRP'), ('তোমাকে', 'PRP'), ('ভালোবাসি', 'VB')]	Positive	Positive
আমার প্রিয় দেশ বাংলাদে	[('আমার', 'PRP'), ('প্রিয়', 'JJ'), ('দেশ', 'NN'), ('বাংলাদে', 'UND')]	Positive	Positive
সে আমাকে প্রতিদিন ফুল দেয়	[('সে', 'PRP'), ('আমাকে', 'PRP'), ('প্রতিদিন', 'JJ'), ('ফুল', 'NN'), ('দেয়', 'VB')]	Positive	Positive
আমি রোজ সকালে স্কুলে যাই	[('আমি', 'PRP'), ('রোজ', 'JJ'), ('সকালে', 'UND'), ('স্কুলে', 'NN'), ('যাই', 'VB')]	Positive	Positive
সাহসীরা সবসময় জয়লাভ করে	[('সাহসীরা', 'NN'), ('সবসময়', 'JJ'), ('জয়লাভ', 'UND'), ('করে', 'VB')]	Positive	Positive
লোহা একটি ধাতু	[('লোহা', 'NN'), ('একটি', 'PRP'), ('ধাতু', 'UND')]	Neutral	Neutral
সে সোনার গহনা খুব পছন্দ করে	[('সে', 'PRP'), ('সোনার', 'UND'), ('গহনা', 'NN'), ('খুব', 'JJ'), ('পছন্দ', 'UND'), ('করে', 'VB')]	Positive	Positive
ভাষাবিজ্ঞান বিভাগে নায়রা ম্যাম খুব ভালো পড়ান	[('ভাষাবিজ্ঞান', 'NN'), ('বিভাগে', 'UND'), ('নায়রা', 'NN'), ('ম্যাম', 'NN'), ('খুব', 'JJ'), ('ভালো', 'VB'), ('পড়ান', 'UND')]	Positive	Positive
বিভাগের চেয়ারম্যান মনিরা ম্যাম খুব ভালো	[('বিভাগের', 'UND'), ('চেয়ারম্যান', 'NN'), ('মনিরা', 'NN'), ('ম্যাম', 'NN'), ('খুব', 'JJ'), ('ভালো', 'VB')]	Positive	Positive
আজকে বৃষ্টি হচ্ছে	[('আজকে', 'RB'), ('বৃষ্টি', 'NN'), ('হচ্ছে', 'VB')]	Neutral	Neutral
এবছর বন্যায় দেশের বড় ক্ষতি হয়েছে	[('এবছর', 'UND'), ('বন্যায়', 'UND'), ('দেশের', 'NN'), ('বড়', 'JJ'), ('ক্ষতি', 'NN'), ('হয়েছে', 'VB')]	Negative	Negative
আজ আকাশ মেঘল	[('আজ', 'RB'), ('আকাশ', 'NN'), ('মেঘল', 'UND')]	Neutral	Neutral
পূর্ণিমার চাঁদ যেন ঝলসানো রুটি	[('পূর্ণিমার', 'UND'), ('চাঁদ', 'NN'), ('যেন', 'CC'), ('ঝলসানো', 'UND'), ('রুটি', 'UND')]	Neutral	Neutral
আবু সাঈদ হত্যার বিচার চাই	[('আবু', 'NN'), ('সাঈদ', 'NN'), ('হত্যার', 'UND'), ('বিচার', 'NN'), ('চাই', 'UND')]	Negative	Negative
৫ আগস্ট বাংলাদেশ নতুন করে জন্মলাভ করলো	[('৫', 'UND'), ('আগস্ট', 'NN'), ('বাংলাদেশ', 'NN'), ('নতুন', 'NN'), ('করে', 'VB'), ('জন্মলাভ', 'NN'), ('করলো', 'UND')]	Positive	Positive
আসিফ ভাইকে নিয়ে আমরা গর্বিত	[('আসিফ', 'NN'), ('ভাইকে', 'UND'), ('নিয়ে', 'UND'), ('আমরা', 'PRP'), ('গর্বিত', 'JJ')]	Positive	Positive
নায়রা ম্যামের ক্লাসের ভিডিওগুলো অসাধারণ	[('নায়রা', 'NN'), ('ম্যামের', 'UND'), ('ক্লাসের', 'UND'), ('ভিডিওগুলো', 'NN'), ('অসাধারণ', 'JJ')]	Positive	Positive
তার ব্যবহার অসাধারণ	[('তার', 'PRP'), ('ব্যবহার', 'UND'), ('অসাধারণ', 'JJ')]	Positive	Positive
মাশরুর স্যার শিক্ষার্থী দের সাহায্য করেন	[('মাশরুর', 'NN'), ('স্যার', 'NN'), ('শিক্ষার্থী', 'NN'), ('দের', 'UND'), ('সাহায্য', 'VB'), ('করেন', 'UND')]	Positive	Positive
ভাষাবিজ্ঞান বিভাগের সিনিয়ররা খুব ভালো ব্যবহার করেন	[('ভাষাবিজ্ঞান', 'NN'), ('বিভাগের', 'UND'), ('সিনিয়ররা', 'UND'), ('খুব', 'JJ'), ('ভালো', 'VB'), ('ব্যবহার', 'UND'), ('করেন', 'UND')]	Positive	Positive
ফুলি, আজ তোমারে বড়ই সৌন্দর্য লাগতেছে	[('ফুলি,', 'UND'), ('আজ', 'RB'), ('তোমারে', 'UND'), ('বড়ই', 'UND'), ('সৌন্দর্য', 'NN'), ('লাগতেছে', 'UND')]	Positive	Positive
সত্য কথা দিনের মধ্যে চৌদ্দ বার বলা যায়	[('সত্য', 'JJ'), ('কথা', 'NN'), ('দিনের', 'UND'), ('মধ্যে', 'UND'), ('চৌদ্দ', 'UND'), ('বার', 'UND'), ('বলা', 'VB'), ('যায়', 'VB')]	Positive	Positive
ও মতি ভাই, মতি ভাই, ও মতি ভাই, মতি ভাই	[('ও', 'PRP'), ('মতি', 'UND'), ('ভাই,', 'UND'), ('মতি', 'UND'), ('ভাই,', 'UND'), ('ও', 'PRP'), ('মতি', 'UND'), ('ভাই,', 'UND'), ('মতি', 'UND'), ('ভাই', 'UND')]	Neutral	Neutral
ফেলি রে ফেলি বুঝবি দিন গেলি	[('ফেলি', 'UND'), ('রে', 'UND'), ('ফেলি', 'UND'), ('বুঝবি', 'UND'), ('দিন', 'UND'), ('গেলি', 'UND')]	Neutral	Neutral
বাংলা ভাষা শুনতে মধুর লাগে	[('বাংলা', 'NN'), ('ভাষা', 'NN'), ('শুনতে', 'VB'), ('মধুর', 'JJ'), ('লাগে', 'UND')]	Positive	Positive
বাংলা আমাদের মাতৃভাষা	[('বাংলা', 'NN'), ('আমাদের', 'PRP'), ('মাতৃভাষা', 'NN')]	Positive	Positive
এ ভাষার জন্য ১৯৫২ সালে আমরা আন্দোলন করেছিলাম	[('এ', 'PRP'), ('ভাষার', 'UND'), ('জন্য', 'UND'), ('১৯৫২', 'UND'), ('সালে', 'UND'), ('আমরা', 'PRP'), ('আন্দোলন', 'NN'), ('করেছিলাম', 'VB')]	Neutral	Neutral
ইমন, তুমি কি আমাকে ভালোবাসো	[('ইমন,', 'UND'), ('তুমি', 'PRP'), ('কি', 'UH'), ('আমাকে', 'PRP'), ('ভালোবাসো', 'UND')]	Positive	Positive
মুগ্ধের প্রতি আমার অসাধারণ মুগ্ধতা কাজ করে	[('মুগ্ধের', 'UND'), ('প্রতি', 'UND'), ('আমার', 'PRP'), ('অসাধারণ', 'JJ'), ('মুগ্ধতা', 'NN'), ('কাজ', 'NN'), ('করে', 'VB')]	Positive	Positive
হিমুরা কখনো কারো হাত ধরে না	[('হিমুরা', 'UND'), ('কখনো', 'RB'), ('কারো', 'RB'), ('হাত', 'NN'), ('ধরে', 'UND'), ('না', 'UH')]	Negative	Negative
আচ্ছা রূপা, তুমি কি কখনো আমার কথা ভাবো	[('আচ্ছা', 'UH'), ('রূপা,', 'UND'), ('তুমি', 'PRP'), ('কি', 'UH'), ('কখনো', 'RB'), ('আমার', 'PRP'), ('কথা', 'NN'), ('ভাবো', 'UND')]	Neutral	Neutral
ওসমান পুকুরে মাছ ধরে	[('ওসমান', 'UND'), ('পুকুরে', 'UND'), ('মাছ', 'NN'), ('ধরে', 'UND')]	Positive	Positive
একটি ঘাসফড়িং ও একটি পিঁপড়া খুব ভালো বন্ধু	[('একটি', 'PRP'), ('ঘাসফড়িং', 'NN'), ('ও', 'PRP'), ('একটি', 'PRP'), ('পিঁপড়া', 'NN'), ('খুব', 'JJ'), ('ভালো', 'VB'), ('বন্ধু', 'NN')]	Positive	Positive
আগুন নিযে খেলা করা উচিত নয়	[('আগুন', 'NN'), ('নিযে', 'UND'), ('খেলা', 'UND'), ('করা', 'VB'), ('উচিত', 'UND'), ('নয়', 'UND')]	Negative	Negative
ভূমিকম্পের সময় শান্ত হয়ে থাকা উচিত	[('ভূমিকম্পের', 'NN'), ('সময়', 'NN'), ('শান্ত', 'JJ'), ('হয়ে', 'VB'), ('থাকা', 'VB'), ('উচিত', 'UND')]	Neutral	Neutral
তুমি কেন আমার জীবন নিয়ে খেলতেছো	[('তুমি', 'PRP'), ('কেন', 'UND'), ('আমার', 'PRP'), ('জীবন', 'NN'), ('নিয়ে', 'UND'), ('খেলতেছো', 'UND')]	Negative	Negative
আগুনে হাত পুড়ে যায়	[('আগুনে', 'UND'), ('হাত', 'NN'), ('পুড়ে', 'UND'), ('যায়', 'VB')]	Negative	Negative
এবারে বন্যায় দেশের বিরাট ক্ষতি হয়েছে	[('এবারে', 'UND'), ('বন্যায়', 'UND'), ('দেশের', 'NN'), ('বিরাট', 'UND'), ('ক্ষতি', 'NN'), ('হয়েছে', 'VB')]	Negative	Negative
শিক্ষকদের সম্মান করা উচিত	[('শিক্ষকদের', 'NN'), ('সম্মান', 'NN'), ('করা', 'VB'), ('উচিত', 'UND')]	Positive	Positive
কিরে, তুই কি ভালো হবি নে প্রিয়ন্তি	[('কিরে,', 'UND'), ('তুই', 'PRP'), ('কি', 'UH'), ('ভালো', 'VB'), ('হবি', 'UND'), ('নে', 'UND'), ('প্রিয়ন্তি', 'NN')]	Positive	Positive
লামিয়া প্লিজ কান্নাকাটি বন্ধ কর। তোকে চা খাওয়াবো	[('লামিয়া', 'NN'), ('প্লিজ', 'UND'), ('কান্নাকাটি', 'NN'), ('বন্ধ', 'UND'), ('কর।', 'UND'), ('তোকে', 'UND'), ('চা', 'UND'), ('খাওয়াবো', 'UND')]	Negative	Negative
আমার রেজাল্ট খালিই খারাপ হয়। আমি আর রেজাল্ট বিপরীত	[('আমার', 'PRP'), ('রেজাল্ট', 'NN'), ('খালিই', 'UND'), ('খারাপ', 'UND'), ('হয়।', 'UND'), ('আমি', 'PRP'), ('আর', 'RB'), ('রেজাল্ট', 'NN'), ('বিপরীত', 'UND')]	Negative	Negative
জীবন মানেই তো যন্ত্রণা	[('জীবন', 'NN'), ('মানেই', 'UND'), ('তো', 'UND'), ('যন্ত্রণা', 'NN')]	Negative	Negative
কতবার ভেবেছিনু আপনা ভুলিয়া, তোমারও চরণে দিবো হৃদয়ও খুলিয়া	[('কতবার', 'UND'), ('ভেবেছিনু', 'UND'), ('আপনা', 'UND'), ('ভুলিয়া,', 'UND'), ('তোমারও', 'UND'), ('চরণে', 'UND'), ('দিবো', 'UND'), ('হৃদয়ও', 'UND'), ('খুলিয়া', 'VB')]	Negative	Negative
বিজ্ঞানের যে শাখায় জীব নিয়ে আলোচনা হয় তাকে জীববিজ্ঞান বলে	[('বিজ্ঞানের', 'UND'), ('যে', 'PRP'), ('শাখায়', 'UND'), ('জীব', 'UND'), ('নিয়ে', 'UND'), ('আলোচনা', 'JJ'), ('হয়', 'VB'), ('তাকে', 'PRP'), ('জীববিজ্ঞান', 'UND'), ('বলে', 'VB')]	Positive	Positive
জাতীয় সংগীত পরিবর্তন করা কি অতই সহজ খোকা	[('জাতীয়', 'UND'), ('সংগীত', 'UND'), ('পরিবর্তন', 'NN'), ('করা', 'VB'), ('কি', 'UH'), ('অতই', 'UND'), ('সহজ', 'JJ'), ('খোকা', 'NN')]	Positive	Positive
তুই আসলে একটা বদ লোক	[('তুই', 'PRP'), ('আসলে', 'UND'), ('একটা', 'UND'), ('বদ', 'UND'), ('লোক', 'NN')]	Positive	Positive
নায়রা ম্যাম আমাকে স্নেহ করে	[('নায়রা', 'NN'), ('ম্যাম', 'NN'), ('আমাকে', 'PRP'), ('স্নেহ', 'NN'), ('করে', 'VB')]	Positive	Positive
আমার বিভাগের শিক্ষকগণ আন্তরিক	[('আমার', 'PRP'), ('বিভাগের', 'UND'), ('শিক্ষকগণ', 'NN'), ('আন্তরিক', 'JJ')]	Positive	Positive
বৈষম্যবিরোধী ছাত্র আন্দোলনে তারা আমাদের পাশে ছিলেন।	[('বৈষম্যবিরোধী', 'UND'), ('ছাত্র', 'NN'), ('আন্দোলনে', 'UND'), ('তারা', 'NN'), ('আমাদের', 'PRP'), ('পাশে', 'NN'), ('ছিলেন।', 'UND')]	Positive	Positive
আমি বাংলায় গান গাই, আমি বাংলার গান গাই	[('আমি', 'PRP'), ('বাংলায়', 'UND'), ('গান', 'NN'), ('গাই,', 'UND'), ('আমি', 'PRP'), ('বাংলার', 'UND'), ('গান', 'NN'), ('গাই', 'UND')]	Positive	Positive
আমি গান পছন্দ করি কিন্তু আমার গানের গলা খারাপ	[('আমি', 'PRP'), ('গান', 'NN'), ('পছন্দ', 'UND'), ('করি', 'UND'), ('কিন্তু', 'CC'), ('আমার', 'PRP'), ('গানের', 'UND'), ('গলা', 'NN'), ('খারাপ', 'UND')]	Positive	Positive
তিনি আমাদের বাংলা পড়ান	[('তিনি', 'PRP'), ('আমাদের', 'PRP'), ('বাংলা', 'NN'), ('পড়ান', 'UND')]	Positive	Positive
জার্মান ভাষা শেখা খুবই কঠিন। আমার যে কত কষ্ট হয় কি আর বলবো	[('জার্মান', 'NN'), ('ভাষা', 'NN'), ('শেখা', 'VB'), ('খুবই', 'UND'), ('কঠিন।', 'UND'), ('আমার', 'PRP'), ('যে', 'PRP'), ('কত', 'UND'), ('কষ্ট', 'NN'), ('হয়', 'VB'), ('কি', 'UH'), ('আর', 'RB'), ('বলবো', 'UND')]	Positive	Positive
শেখ হাসিনা দেশ থেকে পালিয়েছে ৫ ই আগস্ট বিকালে	[('শেখ', 'UND'), ('হাসিনা', 'NN'), ('দেশ', 'NN'), ('থেকে', 'UND'), ('পালিয়েছে', 'UND'), ('৫', 'UND'), ('ই', 'UND'), ('আগস্ট', 'NN'), ('বিকালে', 'UND')]	Positive	Positive
আমাদের দেশে অনেক দুর্নীতি হয়েছে। রাঘব বোয়ালরা ধরা খাচ্ছে	[('আমাদের', 'PRP'), ('দেশে', 'UND'), ('অনেক', 'JJ'), ('দুর্নীতি', 'NN'), ('হয়েছে।', 'UND'), ('রাঘব', 'NN'), ('বোয়ালরা', 'NN'), ('ধরা', 'VB'), ('খাচ্ছে', 'UND')]	Positive	Positive
সৎ মানুষ সব জায়গায় সম্মানিত হন।	[('সৎ', 'JJ'), ('মানুষ', 'NN'), ('সব', 'UND'), ('জায়গায়', 'NN'), ('সম্মানিত', 'UND'), ('হন।', 'UND')]	Positive	Positive
পিতা-মাতাকর সম্মান করা আমাদের কর্তব্য	[('পিতা-মাতাকর', 'UND'), ('সম্মান', 'NN'), ('করা', 'VB'), ('আমাদের', 'PRP'), ('কর্তব্য', 'UND')]	Positive	Positive
জননী ও জন্মভূমি স্বর্গের চেয়েও শ্রেষ্ঠ	[('জননী', 'NN'), ('ও', 'PRP'), ('জন্মভূমি', 'NN'), ('স্বর্গের', 'NN'), ('চেয়েও', 'UND'), ('শ্রেষ্ঠ', 'JJ')]	Positive	Positive
রাজশাহীর আম বিখ্যাত	[('রাজশাহীর', 'NN'), ('আম', 'NN'), ('বিখ্যাত', 'JJ')]	Positive	Positive
বাঙালি শান্তপ্রিয় জাতি	[('বাঙালি', 'NN'), ('শান্তপ্রিয়', 'UND'), ('জাতি', 'NN')]	Positive	Positive
বাংলাকে বিশ্বের দরবারে উপস্থাপনা করবো	[('বাংলাকে', 'UND'), ('বিশ্বের', 'UND'), ('দরবারে', 'NN'), ('উপস্থাপনা', 'JJ'), ('করবো', 'UND')]	Positive	Positive
বকগুলো মাছ ধরে	[('বকগুলো', 'NN'), ('মাছ', 'NN'), ('ধরে', 'UND')]	Neutral	Neutral
সবাই মিলে লালবাগ কেল্লায় ঘুরতে গেল	[('সবাই', 'PRP'), ('মিলে', 'UND'), ('লালবাগ', 'NN'), ('কেল্লায়', 'NN'), ('ঘুরতে', 'UND'), ('গেল', 'VB')]	Positive	Positive
আপা ঘুরে ঘুরে কেল্লার সবকিছু দেখাতে লাগলেন	[('আপা', 'UND'), ('ঘুরে', 'UND'), ('ঘুরে', 'UND'), ('কেল্লার', 'UND'), ('সবকিছু', 'UND'), ('দেখাতে', 'UND'), ('লাগলেন', 'UND')]	Neutral	Neutral
ঢাকার বুড়িগঙ্গা নদীর পানি ময়লায় কালো হয়ে গেছে	[('ঢাকার', 'NN'), ('বুড়িগঙ্গা', 'NN'), ('নদীর', 'NN'), ('পানি', 'NN'), ('ময়লায়', 'UND'), ('কালো', 'UND'), ('হয়ে', 'VB'), ('গেছে', 'UND')]	Negative	Negative
নদী ভরাট করার কারণে নদী মরে যাচ্ছে	[('নদী', 'NN'), ('ভরাট', 'UND'), ('করার', 'UND'), ('কারণে', 'UND'), ('নদী', 'NN'), ('মরে', 'UND'), ('যাচ্ছে', 'VB')]	Neutral	Negative
হালদা নদী মা-মাছের কাছে খুব প্রিয়	[('হালদা', 'NN'), ('নদী', 'NN'), ('মা-মাছের', 'NN'), ('কাছে', 'UND'), ('খুব', 'JJ'), ('প্রিয়', 'JJ')]	Positive	Positive
বাংলাদেশ নদীর দেশ।	[('বাংলাদেশ', 'NN'), ('নদীর', 'NN'), ('দেশ।', 'UND')]	Positive	Positive
বৌদ্ধদের সবচেয়ে বড় উৎসব বুদ্ধ পূর্ণিমা	[('বৌদ্ধদের', 'UND'), ('সবচেয়ে', 'UND'), ('বড়', 'JJ'), ('উৎসব', 'NN'), ('বুদ্ধ', 'UND'), ('পূর্ণিমা', 'NN')]	Positive	Positive
আমি খেলায় প্রথম হয়েছি	[('আমি', 'PRP'), ('খেলায়', 'UND'), ('প্রথম', 'NN'), ('হয়েছি', 'UND')]	Positive	Positive
বিশ্বে নানান রকম মানুষ বাস করে	[('বিশ্বে', 'NN'), ('নানান', 'UND'), ('রকম', 'UND'), ('মানুষ', 'NN'), ('বাস', 'UND'), ('করে', 'VB')]	Negative	Neutral
আমরা শহিদদের স্মরণ করি	[('আমরা', 'PRP'), ('শহিদদের', 'NN'), ('স্মরণ', 'NN'), ('করি', 'UND')]	Positive	Positive
তোমাকে ধন্যবাদ	[('তোমাকে', 'PRP'), ('ধন্যবাদ', 'NN')]	Positive	Positive
তীব্র শীত পড়েছে	[('তীব্র', 'UND'), ('শীত', 'NN'), ('পড়েছে', 'VB')]	Neutral	Negative
প্রতিবেশির সাথে মিলেমিশে থাকি	[('প্রতিবেশির', 'UND'), ('সাথে', 'JJ'), ('মিলেমিশে', 'UND'), ('থাকি', 'VB')]	Positive	Positive
গবেষক ও বিজ্ঞানীরা মিলে তৈরি করেছে নতুন মসলিন। মসলিন আমাদের ঐতিহ্য	[('গবেষক', 'NN'), ('ও', 'PRP'), ('বিজ্ঞানীরা', 'NN'), ('মিলে', 'UND'), ('তৈরি', 'UND'), ('করেছে', 'VB'), ('নতুন', 'NN'), ('মসলিন।', 'UND'), ('মসলিন', 'NN'), ('আমাদের', 'PRP'), ('ঐতিহ্য', 'NN')]	Positive	Positive
মসলিন তৈরি জন্য বিখ্যাত ছিলো ঢাকার সোনারগাঁও অঞ্চল	[('মসলিন', 'NN'), ('তৈরি', 'UND'), ('জন্য', 'UND'), ('বিখ্যাত', 'JJ'), ('ছিলো', 'VB'), ('ঢাকার', 'NN'), ('সোনারগাঁও', 'UND'), ('অঞ্চল', 'NN')]	Positive	Positive
বড়ো হয়ে তিনি দয়ালু মানুষ হিসেবে পরিচিত লাভ করেন। সবাই তাকে ভালোবাসতে শুরু করেন	[('বড়ো', 'UND'), ('হয়ে', 'VB'), ('তিনি', 'PRP'), ('দয়ালু', 'UND'), ('মানুষ', 'NN'), ('হিসেবে', 'UND'), ('পরিচিত', 'UND'), ('লাভ', 'JJ'), ('করেন।', 'UND'), ('সবাই', 'PRP'), ('তাকে', 'PRP'), ('ভালোবাসতে', 'UND'), ('শুরু', 'VB'), ('করেন', 'UND')]	Positive	Positive
পুলিশ জাদুঘর খুব পরিপাটি করে সাজানো	[('পুলিশ', 'UND'), ('জাদুঘর', 'NN'), ('খুব', 'JJ'), ('পরিপাটি', 'UND'), ('করে', 'VB'), ('সাজানো', 'VB')]	Positive	Positive
জাদুঘর দেখতে যাওয়ার কথা শুনে রিতা ও রবিন আনন্দে লাফিয়ে উঠলো।	[('জাদুঘর', 'NN'), ('দেখতে', 'UND'), ('যাওয়ার', 'UND'), ('কথা', 'NN'), ('শুনে', 'VB'), ('রিতা', 'UND'), ('ও', 'PRP'), ('রবিন', 'UND'), ('আনন্দে', 'UND'), ('লাফিয়ে', 'UND'), ('উঠলো।', 'UND')]	Positive	Positive
বেঁচে থাকার জন্য প্রাণীর খাদ্য ও পানির প্রয়োজন	[('বেঁচে', 'UND'), ('থাকার', 'UND'), ('জন্য', 'UND'), ('প্রাণীর', 'UND'), ('খাদ্য', 'NN'), ('ও', 'PRP'), ('পানির', 'UND'), ('প্রয়োজন', 'NN')]	Negative	Neutral
পোকামাকড়ের দেহে হাড় থাকে না।	[('পোকামাকড়ের', 'UND'), ('দেহে', 'UND'), ('হাড়', 'NN'), ('থাকে', 'VB'), ('না।', 'UND')]	Negative	Neutral
আমাদের দেশে সারা বছরই নান স্বাদের ফল পাওয়া যায়	[('আমাদের', 'PRP'), ('দেশে', 'UND'), ('সারা', 'JJ'), ('বছরই', 'UND'), ('নান', 'UND'), ('স্বাদের', 'UND'), ('ফল', 'NN'), ('পাওয়া', 'VB'), ('যায়', 'VB')]	Positive	Positive
আমাদের দেহের গঠন ও ক্ষয় পূরণের জন্য আমিষ প্রয়োজন	[('আমাদের', 'PRP'), ('দেহের', 'NN'), ('গঠন', 'NN'), ('ও', 'PRP'), ('ক্ষয়', 'UND'), ('পূরণের', 'UND'), ('জন্য', 'UND'), ('আমিষ', 'NN'), ('প্রয়োজন', 'NN')]	Negative	Neutral
ফলের মধ্যে দেশি ও মৌসুমি ফল আমাদের জন্য বেশি উপকারী	[('ফলের', 'UND'), ('মধ্যে', 'UND'), ('দেশি', 'UND'), ('ও', 'PRP'), ('মৌসুমি', 'UND'), ('ফল', 'NN'), ('আমাদের', 'PRP'), ('জন্য', 'UND'), ('বেশি', 'JJ'), ('উপকারী', 'JJ')]	Positive	Positive
অনেক ক্ষেত্রে বোতলজাত পানীয়গুলোতে অতিরিক্ত পরিমাণে চিনি ও নান রকম রাসায়নিক পদার্থ ব্যবহার করা হয়	[('অনেক', 'JJ'), ('ক্ষেত্রে', 'UND'), ('বোতলজাত', 'UND'), ('পানীয়গুলোতে', 'NN'), ('অতিরিক্ত', 'JJ'), ('পরিমাণে', 'UND'), ('চিনি', 'NN'), ('ও', 'PRP'), ('নান', 'UND'), ('রকম', 'UND'), ('রাসায়নিক', 'UND'), ('পদার্থ', 'UND'), ('ব্যবহার', 'UND'), ('করা', 'VB'), ('হয়', 'VB')]	Positive	Positive
সূর্য থেকে আমরা সবচেয়ে বেশি আলোক শক্তি পাই	[('সূর্য', 'NN'), ('থেকে', 'UND'), ('আমরা', 'PRP'), ('সবচেয়ে', 'UND'), ('বেশি', 'JJ'), ('আলোক', 'UND'), ('শক্তি', 'NN'), ('পাই', 'UND')]	Positive	Positive
ঘর আলোকিত করার জন্য আমরা সাধারণত আলোকশক্তি ব্যবহার করি	[('ঘর', 'NN'), ('আলোকিত', 'JJ'), ('করার', 'UND'), ('জন্য', 'UND'), ('আমরা', 'PRP'), ('সাধারণত', 'UND'), ('আলোকশক্তি', 'UND'), ('ব্যবহার', 'UND'), ('করি', 'UND')]	Positive	Positive
শক্তি আমাদের জন্য অত্যন্ত মূল্যবান। কিন্তু আমরা নানাভাবে শক্তি অপচয় করে থাকি	[('শক্তি', 'NN'), ('আমাদের', 'PRP'), ('জন্য', 'UND'), ('অত্যন্ত', 'JJ'), ('মূল্যবান।', 'UND'), ('কিন্তু', 'CC'), ('আমরা', 'PRP'), ('নানাভাবে', 'UND'), ('শক্তি', 'NN'), ('অপচয়', 'UND'), ('করে', 'VB'), ('থাকি', 'VB')]	Positive	Positive
বিনা কারণে গাড়ির হর্ন বাজানো উচিত নাহ্	[('বিনা', 'UND'), ('কারণে', 'UND'), ('গাড়ির', 'UND'), ('হর্ন', 'UND'), ('বাজানো', 'VB'), ('উচিত', 'UND'), ('নাহ্', 'UND')]	Negative	Negative
সূর্য থাকার ফলে পৃথিবী আলোকিত হয় এবং আমরা আমাদের চারপাশের পরিবেশ দেখতে পাই	[('সূর্য', 'NN'), ('থাকার', 'UND'), ('ফলে', 'CC'), ('পৃথিবী', 'UND'), ('আলোকিত', 'JJ'), ('হয়', 'VB'), ('এবং', 'CC'), ('আমরা', 'PRP'), ('আমাদের', 'PRP'), ('চারপাশের', 'NN'), ('পরিবেশ', 'NN'), ('দেখতে', 'UND'), ('পাই', 'UND')]	Positive	Positive
সূর্য না থাকলে আমাদের চারপাশ অন্ধকার হয়ে যেত।	[('সূর্য', 'NN'), ('না', 'UH'), ('থাকলে', 'UND'), ('আমাদের', 'PRP'), ('চারপাশ', 'UND'), ('অন্ধকার', 'NN'), ('হয়ে', 'VB'), ('যেত।', 'UND')]	Negative	Negative
সৃষ্টির শুরু থেকেই মানুষ প্রতিনিয়ত জীবনকে সহজ করার জন্য নানান ধরনের প্রযুক্তি ব্যবহারের চেষ্টা করে আসছে।	[('সৃষ্টির', 'NN'), ('শুরু', 'VB'), ('থেকেই', 'UND'), ('মানুষ', 'NN'), ('প্রতিনিয়ত', 'UND'), ('জীবনকে', 'UND'), ('সহজ', 'JJ'), ('করার', 'UND'), ('জন্য', 'UND'), ('নানান', 'UND'), ('ধরনের', 'UND'), ('প্রযুক্তি', 'NN'), ('ব্যবহারের', 'UND'), ('চেষ্টা', 'UND'), ('করে', 'VB'), ('আসছে।', 'UND')]	Positive	Positive
যেকোনো প্রয়োজনীয় তথ্য এখন কম্পিউটারে টাইপ করে সংরক্ষণ করা হচ্ছে।	[('যেকোনো', 'UND'), ('প্রয়োজনীয়', 'UND'), ('তথ্য', 'NN'), ('এখন', 'RB'), ('কম্পিউটারে', 'UND'), ('টাইপ', 'UND'), ('করে', 'VB'), ('সংরক্ষণ', 'VB'), ('করা', 'VB'), ('হচ্ছে।', 'UND')]	Neutral	Neutral
চাকা আবিষ্কার যাতায়াত প্রযুক্তিতে যুগান্তকারী পরিবর্তন এনে দেয়	[('চাকা', 'NN'), ('আবিষ্কার', 'UND'), ('যাতায়াত', 'UND'), ('প্রযুক্তিতে', 'NN'), ('যুগান্তকারী', 'JJ'), ('পরিবর্তন', 'NN'), ('এনে', 'UND'), ('দেয়', 'VB')]	Positive	Positive
মানুষের দৈনন্দিন সব কাজের ক্ষেত্রে প্রযুক্তির ব্যবহার অনস্বীকার্য	[('মানুষের', 'NN'), ('দৈনন্দিন', 'UND'), ('সব', 'UND'), ('কাজের', 'UND'), ('ক্ষেত্রে', 'UND'), ('প্রযুক্তির', 'NN'), ('ব্যবহার', 'UND'), ('অনস্বীকার্য', 'UND')]	Neutral	Neutral
কম্পিউটার ও মোবাইল ফোন দীর্ঘ সময় ব্যবহার করলে চোখের এবং শারীরিক অন্যান্য সমস্যা দেখা দিতে পারে	[('কম্পিউটার', 'NN'), ('ও', 'PRP'), ('মোবাইল', 'NN'), ('ফোন', 'NN'), ('দীর্ঘ', 'UND'), ('সময়', 'NN'), ('ব্যবহার', 'UND'), ('করলে', 'UND'), ('চোখের', 'NN'), ('এবং', 'CC'), ('শারীরিক', 'UND'), ('অন্যান্য', 'UND'), ('সমস্যা', 'NN'), ('দেখা', 'NN'), ('দিতে', 'VB'), ('পারে', 'UND')]	Negative	Negative
ল্যাপটপ বা কম্পিউটারের পাশে খাবার বা পানীয় গ্রহণ করা থেকে বিরত থাকতে হবে	[('ল্যাপটপ', 'NN'), ('বা', 'CC'), ('কম্পিউটারের', 'NN'), ('পাশে', 'NN'), ('খাবার', 'NN'), ('বা', 'CC'), ('পানীয়', 'NN'), ('গ্রহণ', 'VB'), ('করা', 'VB'), ('থেকে', 'UND'), ('বিরত', 'UND'), ('থাকতে', 'UND'), ('হবে', 'VB')]	Positive	Negative
আজকাল প্রযুক্তির মাধ্যমে আমরা খুব সহজেই দূরের মানুষের সাথে যোগাযোগ করতে পারি	[('আজকাল', 'UND'), ('প্রযুক্তির', 'NN'), ('মাধ্যমে', 'UND'), ('আমরা', 'PRP'), ('খুব', 'JJ'), ('সহজেই', 'RB'), ('দূরের', 'NN'), ('মানুষের', 'NN'), ('সাথে', 'JJ'), ('যোগাযোগ', 'NN'), ('করতে', 'VB'), ('পারি', 'UND')]	Positive	Positive
পাঠ্যপুস্তক থেকে আমরা বিভিন্ন বিষয়ের তথ্য পাই	[('পাঠ্যপুস্তক', 'NN'), ('থেকে', 'UND'), ('আমরা', 'PRP'), ('বিভিন্ন', 'JJ'), ('বিষয়ের', 'UND'), ('তথ্য', 'NN'), ('পাই', 'UND')]	Positive	Positive
বিভিন্ন এলকায় বিভিন্ন জাতি, ধর্ম ও গোষ্ঠীর লওক মিলেমিশে বাস করে। এর ফলে তাদের মধ্যে সম্প্রীতি ও বন্ধুত্বপূর্ণ সম্পর্ক গড়ে ওঠে	[('বিভিন্ন', 'JJ'), ('এলকায়', 'NN'), ('বিভিন্ন', 'JJ'), ('জাতি,', 'UND'), ('ধর্ম', 'NN'), ('ও', 'PRP'), ('গোষ্ঠীর', 'UND'), ('লওক', 'UND'), ('মিলেমিশে', 'UND'), ('বাস', 'UND'), ('করে।', 'UND'), ('এর', 'UND'), ('ফলে', 'CC'), ('তাদের', 'PRP'), ('মধ্যে', 'UND'), ('সম্প্রীতি', 'UND'), ('ও', 'PRP'), ('বন্ধুত্বপূর্ণ', 'UND'), ('সম্পর্ক', 'UND'), ('গড়ে', 'UND'), ('ওঠে', 'VB')]	Positive	Positive
গাছ আমাদের অক্সিজেন দেয়, কার্বন ডাই-অক্সাইড শোষণ করে, এবং পরিবেশ সুন্দর রাখে।	[('গাছ', 'NN'), ('আমাদের', 'PRP'), ('অক্সিজেন', 'NN'), ('দেয়,', 'UND'), ('কার্বন', 'NN'), ('ডাই-অক্সাইড', 'NN'), ('শোষণ', 'UND'), ('করে,', 'UND'), ('এবং', 'CC'), ('পরিবেশ', 'NN'), ('সুন্দর', 'JJ'), ('রাখে।', 'UND')]	Positive	Positive
নদ-নদী, খাল-বিল ভরাট করলে জলজ প্রাণীর আবাসস্থল বিনষ্ট হয়, পরিবেশ দূষিত হয়	[('নদ-নদী,', 'UND'), ('খাল-বিল', 'UND'), ('ভরাট', 'UND'), ('করলে', 'UND'), ('জলজ', 'UND'), ('প্রাণীর', 'UND'), ('আবাসস্থল', 'UND'), ('বিনষ্ট', 'UND'), ('হয়,', 'UND'), ('পরিবেশ', 'NN'), ('দূষিত', 'UND'), ('হয়', 'VB')]	Negative	Negative
আমরা একে অন্যকে সহায়তা করবো	[('আমরা', 'PRP'), ('একে', 'PRP'), ('অন্যকে', 'PRP'), ('সহায়তা', 'VB'), ('করবো', 'UND')]	Positive	Positive
বড়দের সম্মান ও ছোটদের স্নেহ করবো	[('বড়দের', 'UND'), ('সম্মান', 'NN'), ('ও', 'PRP'), ('ছোটদের', 'UND'), ('স্নেহ', 'NN'), ('করবো', 'UND')]	Positive	Positive
ইহান একজন বয়স্ক লোককে রাস্তা পার হতে সহায়তা করছে	[('ইহান', 'NN'), ('একজন', 'UND'), ('বয়স্ক', 'UND'), ('লোককে', 'UND'), ('রাস্তা', 'UND'), ('পার', 'UND'), ('হতে', 'UND'), ('সহায়তা', 'VB'), ('করছে', 'VB')]	Positive	Positive
আরিশা তার শিক্ষককে সালাম দিচ্ছে	[('আরিশা', 'NN'), ('তার', 'PRP'), ('শিক্ষককে', 'UND'), ('সালাম', 'JJ'), ('দিচ্ছে', 'VB')]	Positive	Positive
শীতে খুব কষ্ট হচ্ছে বলে শেখ মুজিব এক বৃদ্ধকে নিজের চাদর দিয়ে দিলেন	[('শীতে', 'UND'), ('খুব', 'JJ'), ('কষ্ট', 'NN'), ('হচ্ছে', 'VB'), ('বলে', 'VB'), ('শেখ', 'UND'), ('মুজিব', 'UND'), ('এক', 'UND'), ('বৃদ্ধকে', 'UND'), ('নিজের', 'PRP'), ('চাদর', 'UND'), ('দিয়ে', 'UND'), ('দিলেন', 'UND')]	Positive	Positive
বাংলাদেশের সকল জনগোষ্ঠীর ভাষা, খাবার ও পোশাকের বৈচিত্র্য এদেশের সংস্কৃতিকে সমৃদ্ধ করেছে	[('বাংলাদেশের', 'UND'), ('সকল', 'UND'), ('জনগোষ্ঠীর', 'UND'), ('ভাষা,', 'UND'), ('খাবার', 'NN'), ('ও', 'PRP'), ('পোশাকের', 'UND'), ('বৈচিত্র্য', 'NN'), ('এদেশের', 'UND'), ('সংস্কৃতিকে', 'UND'), ('সমৃদ্ধ', 'JJ'), ('করেছে', 'VB')]	Positive	Positive
পরিবারের কোনো সদস্য অসুস্থ হলে তাদেরকে সেবা করবো।	[('পরিবারের', 'NN'), ('কোনো', 'UND'), ('সদস্য', 'UND'), ('অসুস্থ', 'UND'), ('হলে', 'UND'), ('তাদেরকে', 'PRP'), ('সেবা', 'NN'), ('করবো।', 'UND')]	Positive	Positive
পরিবারের প্রবীণ ব্যক্তিরা আসাদের নিকট পরম শ্রদ্ধেয় ও সম্মানীয় ব্যক্তি	[('পরিবারের', 'NN'), ('প্রবীণ', 'NN'), ('ব্যক্তিরা', 'UND'), ('আসাদের', 'UND'), ('নিকট', 'UND'), ('পরম', 'JJ'), ('শ্রদ্ধেয়', 'JJ'), ('ও', 'PRP'), ('সম্মানীয়', 'UND'), ('ব্যক্তি', 'UND')]	Positive	Positive
রাজধানীতে যানজট পরিস্থিতি দিন দিন খারাপ হচ্ছে	[('রাজধানীতে', 'NN'), ('যানজট', 'NN'), ('পরিস্থিতি', 'UND'), ('দিন', 'UND'), ('দিন', 'UND'), ('খারাপ', 'UND'), ('হচ্ছে', 'VB')]	Negative	Negative
সরকার নতুন কর নীতির ঘোষণা দিয়েছে	[('সরকার', 'UND'), ('নতুন', 'NN'), ('কর', 'UND'), ('নীতির', 'NN'), ('ঘোষণা', 'UND'), ('দিয়েছে', 'UND')]	Positive	Neutral
আজ আন্তর্জাতিক শ্রমিক দিবস পালন করা হচ্ছে	[('আজ', 'RB'), ('আন্তর্জাতিক', 'JJ'), ('শ্রমিক', 'UND'), ('দিবস', 'UND'), ('পালন', 'UND'), ('করা', 'VB'), ('হচ্ছে', 'VB')]	Positive	Positive
মাঠে আজ বাংলাদেশের দুর্দান্ত খেলা দেখা গেছে	[('মাঠে', 'UND'), ('আজ', 'RB'), ('বাংলাদেশের', 'UND'), ('দুর্দান্ত', 'JJ'), ('খেলা', 'UND'), ('দেখা', 'NN'), ('গেছে', 'UND')]	Positive	Positive
বন্যা কবলিত এলাকায় ত্রাণ বিতরণ শুরু হয়েছে	[('বন্যা', 'NN'), ('কবলিত', 'UND'), ('এলাকায়', 'UND'), ('ত্রাণ', 'UND'), ('বিতরণ', 'JJ'), ('শুরু', 'VB'), ('হয়েছে', 'UND')]	Positive	Positive
চলমান বিক্ষোভে অংশ নিয়েছেন হাজার হাজার মানুষ	[('চলমান', 'UND'), ('বিক্ষোভে', 'UND'), ('অংশ', 'JJ'), ('নিয়েছেন', 'UND'), ('হাজার', 'UND'), ('হাজার', 'UND'), ('মানুষ', 'NN')]	Positive	Positive
বিশ্ববিদ্যালয়ে ভর্তির জন্য নতুন নিয়ম প্রণয়ন করা হয়েছে	[('বিশ্ববিদ্যালয়ে', 'UND'), ('ভর্তির', 'UND'), ('জন্য', 'UND'), ('নতুন', 'NN'), ('নিয়ম', 'UND'), ('প্রণয়ন', 'UND'), ('করা', 'VB'), ('হয়েছে', 'UND')]	Positive	Positive
করোনা ভাইরাসের টিকার কার্যকারিতা নিয়ে গবেষণা চলছে	[('করোনা', 'UND'), ('ভাইরাসের', 'UND'), ('টিকার', 'UND'), ('কার্যকারিতা', 'JJ'), ('নিয়ে', 'UND'), ('গবেষণা', 'NN'), ('চলছে', 'VB')]	Positive	Positive
আজ রাতে চাঁদপুরে ঘূর্ণিঝড় আঘাত হানার আশঙ্কা রয়েছে	[('আজ', 'RB'), ('রাতে', 'NN'), ('চাঁদপুরে', 'UND'), ('ঘূর্ণিঝড়', 'UND'), ('আঘাত', 'UND'), ('হানার', 'UND'), ('আশঙ্কা', 'UND'), ('রয়েছে', 'UND')]	Negative	Negative
পররাষ্ট্র নীতি নিয়ে আলোচনা সভায় বিশিষ্ট ব্যক্তিরা অংশগ্রহণ করেছেন	[('পররাষ্ট্র', 'UND'), ('নীতি', 'UND'), ('নিয়ে', 'UND'), ('আলোচনা', 'JJ'), ('সভায়', 'UND'), ('বিশিষ্ট', 'UND'), ('ব্যক্তিরা', 'UND'), ('অংশগ্রহণ', 'UND'), ('করেছেন', 'UND')]	Positive	Positive
একটি পাতা ঝরে পড়ার সাথে সাথে সে তার শৈশবের কথা মনে করল	[('একটি', 'PRP'), ('পাতা', 'UND'), ('ঝরে', 'UND'), ('পড়ার', 'UND'), ('সাথে', 'JJ'), ('সাথে', 'JJ'), ('সে', 'PRP'), ('তার', 'PRP'), ('শৈশবের', 'UND'), ('কথা', 'NN'), ('মনে', 'NN'), ('করল', 'UND')]	Positive	Positive
মেঘের আড়ালে লুকিয়ে ছিল তারাদের দল	[('মেঘের', 'UND'), ('আড়ালে', 'UND'), ('লুকিয়ে', 'UND'), ('ছিল', 'UND'), ('তারাদের', 'UND'), ('দল', 'UND')]	Neutral	Neutral
পাহাড়ের গা বেয়ে নেমে আসা ঝর্ণার শব্দ তাকে মুগ্ধ করে	[('পাহাড়ের', 'UND'), ('গা', 'UND'), ('বেয়ে', 'UND'), ('নেমে', 'UND'), ('আসা', 'VB'), ('ঝর্ণার', 'UND'), ('শব্দ', 'NN'), ('তাকে', 'PRP'), ('মুগ্ধ', 'NN'), ('করে', 'VB')]	Positive	Positive
অনেক দূরের অজানা এক দেশে তার যাত্রা শুরু হলো	[('অনেক', 'JJ'), ('দূরের', 'NN'), ('অজানা', 'UND'), ('এক', 'UND'), ('দেশে', 'UND'), ('তার', 'PRP'), ('যাত্রা', 'UND'), ('শুরু', 'VB'), ('হলো', 'VB')]	Positive	Positive
প্রাচীন মন্দিরের সামনে দাঁড়িয়ে সে ইতিহাসের ধ্বংসাবশেষ অনুভব করল	[('প্রাচীন', 'UND'), ('মন্দিরের', 'UND'), ('সামনে', 'UND'), ('দাঁড়িয়ে', 'UND'), ('সে', 'PRP'), ('ইতিহাসের', 'UND'), ('ধ্বংসাবশেষ', 'UND'), ('অনুভব', 'UND'), ('করল', 'UND')]	Positive	Negative
ক্লান্ত পাখিটি দূরের গাছের ডালে আশ্রয় নিল	[('ক্লান্ত', 'VB'), ('পাখিটি', 'UND'), ('দূরের', 'NN'), ('গাছের', 'UND'), ('ডালে', 'UND'), ('আশ্রয়', 'UND'), ('নিল', 'UND')]	Negative	Negative
তারা দুজনে একসাথে সমুদ্রের ধারে বসে সূর্যাস্ত দেখছিল	[('তারা', 'NN'), ('দুজনে', 'UND'), ('একসাথে', 'JJ'), ('সমুদ্রের', 'NN'), ('ধারে', 'UND'), ('বসে', 'VB'), ('সূর্যাস্ত', 'UND'), ('দেখছিল', 'VB')]	Positive	Positive
রাতে জোনাকির আলোতে সারা মাঠ ঝলমল করছিল	[('রাতে', 'NN'), ('জোনাকির', 'UND'), ('আলোতে', 'UND'), ('সারা', 'JJ'), ('মাঠ', 'UND'), ('ঝলমল', 'JJ'), ('করছিল', 'VB')]	Positive	Positive
নদীর পাড়ে বসে সে ভাবতে লাগল জীবনের অর্থ নিয়ে	[('নদীর', 'NN'), ('পাড়ে', 'UND'), ('বসে', 'VB'), ('সে', 'PRP'), ('ভাবতে', 'VB'), ('লাগল', 'VB'), ('জীবনের', 'NN'), ('অর্থ', 'NN'), ('নিয়ে', 'UND')]	Negative	Negative
পুরনো দিনের গল্প শুনে সে স্মৃতিতে ফিরে গেল	[('পুরনো', 'UND'), ('দিনের', 'UND'), ('গল্প', 'NN'), ('শুনে', 'VB'), ('সে', 'PRP'), ('স্মৃতিতে', 'UND'), ('ফিরে', 'VB'), ('গেল', 'VB')]	Positive	Positive
বইয়ের পাতায় পাতায় লুকিয়ে আছে জ্ঞানের অমূল্য ধন	[('বইয়ের', 'UND'), ('পাতায়', 'UND'), ('পাতায়', 'UND'), ('লুকিয়ে', 'UND'), ('আছে', 'VB'), ('জ্ঞানের', 'UND'), ('অমূল্য', 'JJ'), ('ধন', 'UND')]	Positive	Positive
রাতে আকাশের তারা দেখার মজা আলাদা	[('রাতে', 'NN'), ('আকাশের', 'NN'), ('তারা', 'NN'), ('দেখার', 'VB'), ('মজা', 'JJ'), ('আলাদা', 'UND')]	Positive	Positive
প্রকৃতির কোলে বসে মনটা যেন হালকা হয়ে যায়	[('প্রকৃতির', 'NN'), ('কোলে', 'UND'), ('বসে', 'VB'), ('মনটা', 'UND'), ('যেন', 'CC'), ('হালকা', 'JJ'), ('হয়ে', 'UND'), ('যায়', 'UND')]	Positive	Positive
তোমার সাথে দেখা না হলে দিনটি ভালো কাটে না	[('তোমার', 'PRP'), ('সাথে', 'JJ'), ('দেখা', 'NN'), ('না', 'UH'), ('হলে', 'UND'), ('দিনটি', 'NN'), ('ভালো', 'VB'), ('কাটে', 'VB'), ('না', 'UH')]	Positive	Positive
আজ আকাশে মেঘের খেলা দেখতে দেখতে সময় কাটিয়েছি	[('আজ', 'RB'), ('আকাশে', 'NN'), ('মেঘের', 'UND'), ('খেলা', 'UND'), ('দেখতে', 'UND'), ('দেখতে', 'UND'), ('সময়', 'NN'), ('কাটিয়েছি', 'UND')]	Neutral	Neutral
আমাদের গ্রামে প্রতি বছর একটি বড় মেলা হয়	[('আমাদের', 'PRP'), ('গ্রামে', 'UND'), ('প্রতি', 'UND'), ('বছর', 'UND'), ('একটি', 'PRP'), ('বড়', 'UND'), ('মেলা', 'JJ'), ('হয়', 'UND')]	Positive	Positive
আজকে আমরা নতুন একটি রেস্তোরাঁয় খেতে গিয়েছিলাম	[('আজকে', 'RB'), ('আমরা', 'PRP'), ('নতুন', 'NN'), ('একটি', 'PRP'), ('রেস্তোরাঁয়', 'UND'), ('খেতে', 'VB'), ('গিয়েছিলাম', 'UND')]	Positive	Positive
তুমি কি আমাকে আগামীকাল সাহায্য করতে পারবে	[('তুমি', 'PRP'), ('কি', 'UH'), ('আমাকে', 'PRP'), ('আগামীকাল', 'RB'), ('সাহায্য', 'VB'), ('করতে', 'VB'), ('পারবে', 'UND')]	Positive	Positive
আজকের সূর্যাস্ত অনেক সুন্দর ছিল	[('আজকের', 'UND'), ('সূর্যাস্ত', 'UND'), ('অনেক', 'JJ'), ('সুন্দর', 'JJ'), ('ছিল', 'UND')]	Positive	Positive
নতুন সিনেমার ট্রেলার দেখে মনে হলো এটি অসাধারণ হবে	[('নতুন', 'NN'), ('সিনেমার', 'UND'), ('ট্রেলার', 'UND'), ('দেখে', 'UND'), ('মনে', 'NN'), ('হলো', 'VB'), ('এটি', 'PRP'), ('অসাধারণ', 'JJ'), ('হবে', 'VB')]	Positive	Positive
বাগানের ফুলগুলো আজ খুব সুন্দর ফুটেছে	[('বাগানের', 'UND'), ('ফুলগুলো', 'UND'), ('আজ', 'RB'), ('খুব', 'JJ'), ('সুন্দর', 'JJ'), ('ফুটেছে', 'UND')]	Positive	Positive
আমার ছোট বোনের জন্মদিন আগামীকাল	[('আমার', 'PRP'), ('ছোট', 'UND'), ('বোনের', 'UND'), ('জন্মদিন', 'JJ'), ('আগামীকাল', 'RB')]	Positive	Positive
তুমি কি শুনেছো, শহরে নতুন একটি পার্ক তৈরি হচ্ছে	[('তুমি', 'PRP'), ('কি', 'UH'), ('শুনেছো,', 'UND'), ('শহরে', 'UND'), ('নতুন', 'NN'), ('একটি', 'PRP'), ('পার্ক', 'UND'), ('তৈরি', 'UND'), ('হচ্ছে', 'VB')]	Positive	Positive
বাইরে বৃষ্টি পড়ছে, আর আমি বই পড়ে সময় কাটাচ্ছি	[('বাইরে', 'UND'), ('বৃষ্টি', 'NN'), ('পড়ছে,', 'UND'), ('আর', 'RB'), ('আমি', 'PRP'), ('বই', 'NN'), ('পড়ে', 'UND'), ('সময়', 'NN'), ('কাটাচ্ছি', 'UND')]	Neutral	Neutral
আমরা আগামী সপ্তাহে একটি পিকনিকে যাচ্ছি	[('আমরা', 'PRP'), ('আগামী', 'UND'), ('সপ্তাহে', 'NN'), ('একটি', 'PRP'), ('পিকনিকে', 'UND'), ('যাচ্ছি', 'UND')]	Positive	Positive
তোমার প্রিয় রং কী	[('তোমার', 'PRP'), ('প্রিয়', 'UND'), ('রং', 'UND'), ('কী', 'UND')]	Neutral	Neutral
তুমি কি আজ রাতে আমাদের সাথে ডিনার করতে চাও	[('তুমি', 'PRP'), ('কি', 'UH'), ('আজ', 'RB'), ('রাতে', 'NN'), ('আমাদের', 'PRP'), ('সাথে', 'JJ'), ('ডিনার', 'UND'), ('করতে', 'VB'), ('চাও', 'VB')]	Positive	Positive
এই গরমে ঠাণ্ডা কিছু খেতে ভালো লাগে	[('এই', 'PRP'), ('গরমে', 'UND'), ('ঠাণ্ডা', 'UND'), ('কিছু', 'PRP'), ('খেতে', 'VB'), ('ভালো', 'VB'), ('লাগে', 'UND')]	Positive	Positive
স্কুলের খেলার মাঠে আজ খুব মজা হয়েছে	[('স্কুলের', 'UND'), ('খেলার', 'UND'), ('মাঠে', 'UND'), ('আজ', 'RB'), ('খুব', 'JJ'), ('মজা', 'JJ'), ('হয়েছে', 'UND')]	Positive	Positive
আমাদের বাসার সামনের গাছটিতে অনেক পাখি এসেছে	[('আমাদের', 'PRP'), ('বাসার', 'UND'), ('সামনের', 'UND'), ('গাছটিতে', 'UND'), ('অনেক', 'JJ'), ('পাখি', 'NN'), ('এসেছে', 'VB')]	Positive	Positive
আজ ঢাকায় তীব্র যানজট দেখা গেছে	[('আজ', 'RB'), ('ঢাকায়', 'UND'), ('তীব্র', 'UND'), ('যানজট', 'NN'), ('দেখা', 'NN'), ('গেছে', 'UND')]	Negative	Negative
প্রধানমন্ত্রী আজ একটি নতুন প্রকল্পের উদ্বোধন করেছেন	[('প্রধানমন্ত্রী', 'UND'), ('আজ', 'RB'), ('একটি', 'PRP'), ('নতুন', 'NN'), ('প্রকল্পের', 'UND'), ('উদ্বোধন', 'UND'), ('করেছেন', 'UND')]	Positive	Positive
বাংলাদেশে বন্যার কারণে ব্যাপক ক্ষয়ক্ষতি হয়েছে	[('বাংলাদেশে', 'UND'), ('বন্যার', 'NN'), ('কারণে', 'UND'), ('ব্যাপক', 'UND'), ('ক্ষয়ক্ষতি', 'UND'), ('হয়েছে', 'UND')]	Positive	Negative
বিশ্বব্যাপী মহামারির কারণে অর্থনীতি সংকটে পড়েছে	[('বিশ্বব্যাপী', 'UND'), ('মহামারির', 'UND'), ('কারণে', 'UND'), ('অর্থনীতি', 'UND'), ('সংকটে', 'UND'), ('পড়েছে', 'UND')]	Negative	Negative
দেশের শিক্ষা ব্যবস্থা আধুনিকায়নের পরিকল্পনা চলছে	[('দেশের', 'NN'), ('শিক্ষা', 'NN'), ('ব্যবস্থা', 'NN'), ('আধুনিকায়নের', 'UND'), ('পরিকল্পনা', 'NN'), ('চলছে', 'VB')]	Positive	Positive
সে গভীরভাবে ভাবতে লাগল, এই জীবনের অর্থ কী	[('সে', 'PRP'), ('গভীরভাবে', 'RB'), ('ভাবতে', 'VB'), ('লাগল,', 'UND'), ('এই', 'PRP'), ('জীবনের', 'NN'), ('অর্থ', 'NN'), ('কী', 'UND')]	Positive	Positive
নদীর কোল ঘেঁষে ছোট্ট একটি গ্রাম, সেখানেই সে তার শৈশব কাটিয়েছে	[('নদীর', 'NN'), ('কোল', 'NN'), ('ঘেঁষে', 'VB'), ('ছোট্ট', 'JJ'), ('একটি', 'PRP'), ('গ্রাম,', 'UND'), ('সেখানেই', 'RB'), ('সে', 'PRP'), ('তার', 'PRP'), ('শৈশব', 'UND'), ('কাটিয়েছে', 'UND')]	Positive	Positive
বইয়ের পাতা উল্টে সে হারিয়ে গেল কল্পনার জগতে	[('বইয়ের', 'UND'), ('পাতা', 'UND'), ('উল্টে', 'UND'), ('সে', 'PRP'), ('হারিয়ে', 'UND'), ('গেল', 'VB'), ('কল্পনার', 'NN'), ('জগতে', 'NN')]	Negative	Negative
একদিন সে অনেক দূর যাবে, এই আশায় বুক বেঁধে আছে	[('একদিন', 'PRP'), ('সে', 'PRP'), ('অনেক', 'JJ'), ('দূর', 'RB'), ('যাবে,', 'UND'), ('এই', 'PRP'), ('আশায়', 'UND'), ('বুক', 'NN'), ('বেঁধে', 'VB'), ('আছে', 'VB')]	Positive	Positive
রাতে আকাশের তারা গুনতে গুনতে তার ঘুম এসে গেল	[('রাতে', 'NN'), ('আকাশের', 'NN'), ('তারা', 'NN'), ('গুনতে', 'VB'), ('গুনতে', 'VB'), ('তার', 'PRP'), ('ঘুম', 'NN'), ('এসে', 'UND'), ('গেল', 'VB')]	Neutral	Positive
আমি একটি নতুন বই পড়তে শুরু করেছি	[('আমি', 'PRP'), ('একটি', 'PRP'), ('নতুন', 'NN'), ('বই', 'NN'), ('পড়তে', 'UND'), ('শুরু', 'VB'), ('করেছি', 'VB')]	Positive	Positive
তোমার সাথে দেখা না হলে দিনটি অসম্পূর্ণ মনে হয়	[('তোমার', 'PRP'), ('সাথে', 'JJ'), ('দেখা', 'NN'), ('না', 'UH'), ('হলে', 'UND'), ('দিনটি', 'NN'), ('অসম্পূর্ণ', 'JJ'), ('মনে', 'NN'), ('হয়', 'UND')]	Positive	Positive
এই পথে হেঁটে চলতে চলতে আমি ক্লান্ত হয়ে পড়েছি	[('এই', 'PRP'), ('পথে', 'NN'), ('হেঁটে', 'VB'), ('চলতে', 'UND'), ('চলতে', 'UND'), ('আমি', 'PRP'), ('ক্লান্ত', 'VB'), ('হয়ে', 'UND'), ('পড়েছি', 'UND')]	Negative	Negative
আমার বন্ধু আগামী সপ্তাহে বিদেশে যাবে	[('আমার', 'PRP'), ('বন্ধু', 'NN'), ('আগামী', 'UND'), ('সপ্তাহে', 'NN'), ('বিদেশে', 'NN'), ('যাবে', 'VB')]	Neutral	Neutral
তুমি কি আজ বিকেলে আড্ডা দিতে চাও	[('তুমি', 'PRP'), ('কি', 'UH'), ('আজ', 'RB'), ('বিকেলে', 'NN'), ('আড্ডা', 'NN'), ('দিতে', 'VB'), ('চাও', 'VB')]	Neutral	Neutral
বৃষ্টির শব্দে মনটা ভালো হয়ে যায়	[('বৃষ্টির', 'NN'), ('শব্দে', 'NN'), ('মনটা', 'UND'), ('ভালো', 'VB'), ('হয়ে', 'UND'), ('যায়', 'UND')]	Positive	Positive
সে খুব মনোযোগ সহকারে কাজ করছে	[('সে', 'PRP'), ('খুব', 'JJ'), ('মনোযোগ', 'NN'), ('সহকারে', 'UND'), ('কাজ', 'NN'), ('করছে', 'VB')]	Positive	Positive
আমরা সকলে একত্রে একটি ছবি তুললাম	[('আমরা', 'PRP'), ('সকলে', 'NN'), ('একত্রে', 'RB'), ('একটি', 'PRP'), ('ছবি', 'NN'), ('তুললাম', 'VB')]	Positive	Positive
আজকের আবহাওয়া খুব সুন্দর	[('আজকের', 'UND'), ('আবহাওয়া', 'UND'), ('খুব', 'JJ'), ('সুন্দর', 'JJ')]	Positive	Positive
নতুন জুতা পরে হাঁটতে বের হয়েছি	[('নতুন', 'NN'), ('জুতা', 'NN'), ('পরে', 'VB'), ('হাঁটতে', 'UND'), ('বের', 'UND'), ('হয়েছি', 'UND')]	Positive	Positive
রাত্রি যত গভীর হয়, মানুষের চিন্তাগুলো ততই স্পষ্ট হয়ে ওঠে	[('রাত্রি', 'UND'), ('যত', 'CC'), ('গভীর', 'JJ'), ('হয়,', 'UND'), ('মানুষের', 'NN'), ('চিন্তাগুলো', 'NN'), ('ততই', 'UND'), ('স্পষ্ট', 'JJ'), ('হয়ে', 'UND'), ('ওঠে', 'VB')]	Positive	Positive
বিবেকের আলো ছাড়া মানুষ অন্ধকারে পথ হারায়	[('বিবেকের', 'NN'), ('আলো', 'NN'), ('ছাড়া', 'UND'), ('মানুষ', 'NN'), ('অন্ধকারে', 'JJ'), ('পথ', 'NN'), ('হারায়', 'UND')]	Negative	Negative
জীবনের প্রতিটি মুহূর্তই এক একবারের জন্য পাওয়া	[('জীবনের', 'NN'), ('প্রতিটি', 'UND'), ('মুহূর্তই', 'UND'), ('এক', 'UND'), ('একবারের', 'UND'), ('জন্য', 'UND'), ('পাওয়া', 'UND')]	Negative	Neutral
মানুষের চাওয়া পাওয়া সীমাহীন, তবু হৃদয় সন্তুষ্ট হয় ছোট্ট কিছুতে	[('মানুষের', 'NN'), ('চাওয়া', 'VB'), ('পাওয়া', 'UND'), ('সীমাহীন,', 'UND'), ('তবু', 'CC'), ('হৃদয়', 'UND'), ('সন্তুষ্ট', 'JJ'), ('হয়', 'UND'), ('ছোট্ট', 'JJ'), ('কিছুতে', 'UND')]	Positive	Positive
প্রকৃতি কখনও কারও জন্য অপেক্ষা করে না	[('প্রকৃতি', 'NN'), ('কখনও', 'RB'), ('কারও', 'UND'), ('জন্য', 'UND'), ('অপেক্ষা', 'UND'), ('করে', 'VB'), ('না', 'UH')]	Positive	Negative
স্বপ্ন শুধু স্বপ্ন থাকে না, তা একদিন বাস্তবে রূপ নেয়	[('স্বপ্ন', 'NN'), ('শুধু', 'RB'), ('স্বপ্ন', 'NN'), ('থাকে', 'VB'), ('না,', 'UND'), ('তা', 'PRP'), ('একদিন', 'PRP'), ('বাস্তবে', 'UND'), ('রূপ', 'UND'), ('নেয়', 'UND')]	Negative	Negative
মানুষের হাসির পেছনে লুকিয়ে থাকে হাজারো না বলা কথা	[('মানুষের', 'NN'), ('হাসির', 'NN'), ('পেছনে', 'UND'), ('লুকিয়ে', 'UND'), ('থাকে', 'VB'), ('হাজারো', 'UND'), ('না', 'UH'), ('বলা', 'VB'), ('কথা', 'NN')]	Positive	Negative
প্রতিটি সূর্যোদয়ের মধ্যে লুকিয়ে থাকে নতুন আশার সূচনা	[('প্রতিটি', 'UND'), ('সূর্যোদয়ের', 'UND'), ('মধ্যে', 'UND'), ('লুকিয়ে', 'UND'), ('থাকে', 'VB'), ('নতুন', 'NN'), ('আশার', 'UND'), ('সূচনা', 'UND')]	Positive	Positive
আজকের প্রধান শিরোনাম: দেশের অর্থনীতিতে ব্যাপক পরিবর্তনের সম্ভাবনা	[('আজকের', 'UND'), ('প্রধান', 'JJ'), ('শিরোনাম:', 'UND'), ('দেশের', 'NN'), ('অর্থনীতিতে', 'NN'), ('ব্যাপক', 'UND'), ('পরিবর্তনের', 'UND'), ('সম্ভাবনা', 'NN')]	Positive	Positive
রাজধানীতে নতুন হাসপাতালের নির্মাণ কাজ শুরু হয়েছে	[('রাজধানীতে', 'NN'), ('নতুন', 'NN'), ('হাসপাতালের', 'NN'), ('নির্মাণ', 'NN'), ('কাজ', 'NN'), ('শুরু', 'VB'), ('হয়েছে', 'UND')]	Positive	Positive
সরকারের নতুন পরিকল্পনায় দেশের শিক্ষাখাতে বিনিয়োগ বাড়ছে	[('সরকারের', 'NN'), ('নতুন', 'NN'), ('পরিকল্পনায়', 'UND'), ('দেশের', 'NN'), ('শিক্ষাখাতে', 'NN'), ('বিনিয়োগ', 'UND'), ('বাড়ছে', 'JJ')]	Positive	Positive
সড়ক দুর্ঘটনা রোধে নতুন আইন প্রণয়ন করেছে প্রশাসন	[('সড়ক', 'UND'), ('দুর্ঘটনা', 'NN'), ('রোধে', 'UND'), ('নতুন', 'NN'), ('আইন', 'NN'), ('প্রণয়ন', 'UND'), ('করেছে', 'VB'), ('প্রশাসন', 'UND')]	Positive	Positive
মৌসুমী বৃষ্টিতে বিভিন্ন অঞ্চলে বন্যার সতর্কতা জারি করা হয়েছে	[('মৌসুমী', 'NN'), ('বৃষ্টিতে', 'NN'), ('বিভিন্ন', 'JJ'), ('অঞ্চলে', 'UND'), ('বন্যার', 'NN'), ('সতর্কতা', 'NN'), ('জারি', 'VB'), ('করা', 'VB'), ('হয়েছে', 'UND')]	Positive	Positive
রাজধানীতে ট্রাফিক সমস্যার কারণে জনজীবনে চরম দুর্ভোগ	[('রাজধানীতে', 'NN'), ('ট্রাফিক', 'NN'), ('সমস্যার', 'NN'), ('কারণে', 'UND'), ('জনজীবনে', 'NN'), ('চরম', 'JJ'), ('দুর্ভোগ', 'NN')]	Negative	Negative
সরকারের নতুন নীতির কারণে কৃষি খাতে ব্যাপক পরিবর্তন আসছে	[('সরকারের', 'NN'), ('নতুন', 'NN'), ('নীতির', 'NN'), ('কারণে', 'UND'), ('কৃষি', 'NN'), ('খাতে', 'UND'), ('ব্যাপক', 'UND'), ('পরিবর্তন', 'NN'), ('আসছে', 'UND')]	Positive	Positive
বিদ্যুতের ঘাটতির কারণে বিভিন্ন এলাকায় লোডশেডিং চলছে	[('বিদ্যুতের', 'NN'), ('ঘাটতির', 'NN'), ('কারণে', 'UND'), ('বিভিন্ন', 'JJ'), ('এলাকায়', 'UND'), ('লোডশেডিং', 'NN'), ('চলছে', 'VB')]	Positive	Positive
তোমার প্রতিটি হাসি যেন এক নীরব কবিতার মতো	[('তোমার', 'PRP'), ('প্রতিটি', 'UND'), ('হাসি', 'JJ'), ('যেন', 'CC'), ('এক', 'UND'), ('নীরব', 'UND'), ('কবিতার', 'UND'), ('মতো', 'UND')]	Positive	Positive
স্বপ্নগুলো বাস্তবের মাটিতে পা ফেলতেই আরেক রূপ নেয়	[('স্বপ্নগুলো', 'UND'), ('বাস্তবের', 'UND'), ('মাটিতে', 'UND'), ('পা', 'UND'), ('ফেলতেই', 'UND'), ('আরেক', 'UND'), ('রূপ', 'UND'), ('নেয়', 'UND')]	Negative	Negative
তোমার কথা মনে পড়লেই মনে হয়, জীবন এতটা সুন্দর হতে পারে	[('তোমার', 'PRP'), ('কথা', 'NN'), ('মনে', 'NN'), ('পড়লেই', 'UND'), ('মনে', 'NN'), ('হয়,', 'UND'), ('জীবন', 'NN'), ('এতটা', 'UND'), ('সুন্দর', 'JJ'), ('হতে', 'UND'), ('পারে', 'UND')]	Positive	Positive
পাহাড়ের চূড়ায় দাঁড়িয়ে আকাশটা যেন আরও কাছের মনে হয়	[('পাহাড়ের', 'UND'), ('চূড়ায়', 'UND'), ('দাঁড়িয়ে', 'UND'), ('আকাশটা', 'UND'), ('যেন', 'CC'), ('আরও', 'RB'), ('কাছের', 'JJ'), ('মনে', 'NN'), ('হয়', 'UND')]	Positive	Positive
পৃথিবীর প্রতিটি কোণায় রয়েছে এক একটি অজানা গল্প	[('পৃথিবীর', 'NN'), ('প্রতিটি', 'UND'), ('কোণায়', 'UND'), ('রয়েছে', 'UND'), ('এক', 'UND'), ('একটি', 'PRP'), ('অজানা', 'UND'), ('গল্প', 'NN')]	Negative	Negative
নদীর তীরে বসে মনে হয়, সময় যেন এখানে থেমে আছে	[('নদীর', 'NN'), ('তীরে', 'UND'), ('বসে', 'VB'), ('মনে', 'NN'), ('হয়,', 'UND'), ('সময়', 'NN'), ('যেন', 'CC'), ('এখানে', 'RB'), ('থেমে', 'UND'), ('আছে', 'VB')]	Positive	Positive
বৃষ্টির শব্দে লুকিয়ে থাকে এক অদ্ভুত প্রশান্তি	[('বৃষ্টির', 'NN'), ('শব্দে', 'NN'), ('লুকিয়ে', 'UND'), ('থাকে', 'VB'), ('এক', 'UND'), ('অদ্ভুত', 'JJ'), ('প্রশান্তি', 'UND')]	Positive	Positive
আলো-আঁধারির এই খেলায় জীবন নিজেকে খুঁজে ফেরে	[('আলো-আঁধারির', 'UND'), ('এই', 'PRP'), ('খেলায়', 'UND'), ('জীবন', 'NN'), ('নিজেকে', 'UND'), ('খুঁজে', 'VB'), ('ফেরে', 'UND')]	Negative	Negative
মানুষের জীবনে ছোট ছোট মুহূর্তগুলোই সবচেয়ে বেশি মুল্যবান	[('মানুষের', 'NN'), ('জীবনে', 'NN'), ('ছোট', 'UND'), ('ছোট', 'UND'), ('মুহূর্তগুলোই', 'UND'), ('সবচেয়ে', 'UND'), ('বেশি', 'JJ'), ('মুল্যবান', 'UND')]	Positive	Positive
সময় কখনও কারও জন্য থেমে থাকে না, তাকে আপন করতে হয়	[('সময়', 'NN'), ('কখনও', 'RB'), ('কারও', 'UND'), ('জন্য', 'UND'), ('থেমে', 'UND'), ('থাকে', 'VB'), ('না,', 'UND'), ('তাকে', 'PRP'), ('আপন', 'UND'), ('করতে', 'VB'), ('হয়', 'UND')]	Negative	Negative
আত্মবিশ্বাসের সঙ্গে যে চলে, তাকে থামানো যায় না	[('আত্মবিশ্বাসের', 'UND'), ('সঙ্গে', 'UND'), ('যে', 'PRP'), ('চলে,', 'UND'), ('তাকে', 'PRP'), ('থামানো', 'UND'), ('যায়', 'UND'), ('না', 'UH')]	Positive	Positive
দুঃখ কষ্টই মানুষকে জীবন সম্পর্কে গভীরতা শেখায়	[('দুঃখ', 'UND'), ('কষ্টই', 'UND'), ('মানুষকে', 'UND'), ('জীবন', 'NN'), ('সম্পর্কে', 'UND'), ('গভীরতা', 'NN'), ('শেখায়', 'UND')]	Positive	Positive
প্রেমের অনুভূতি মানুষের হৃদয়ে নতুন আলো জ্বালায়	[('প্রেমের', 'NN'), ('অনুভূতি', 'NN'), ('মানুষের', 'NN'), ('হৃদয়ে', 'UND'), ('নতুন', 'NN'), ('আলো', 'NN'), ('জ্বালায়', 'UND')]	Positive	Positive
প্রতিটি ছোট সফলতাই একদিন বড় জয়ের দিকে নিয়ে যায়	[('প্রতিটি', 'UND'), ('ছোট', 'UND'), ('সফলতাই', 'UND'), ('একদিন', 'PRP'), ('বড়', 'UND'), ('জয়ের', 'UND'), ('দিকে', 'UND'), ('নিয়ে', 'UND'), ('যায়', 'UND')]	Positive	Positive
পাহাড়ের চূড়ায় দাঁড়িয়ে সমুদ্রের ঢেউয়ের গর্জন শুনতে পাই	[('পাহাড়ের', 'UND'), ('চূড়ায়', 'UND'), ('দাঁড়িয়ে', 'UND'), ('সমুদ্রের', 'NN'), ('ঢেউয়ের', 'UND'), ('গর্জন', 'NN'), ('শুনতে', 'VB'), ('পাই', 'UND')]	Positive	Positive
তোমার প্রতিটি পদক্ষেপ যেন এক নতুন গল্পের সূচনা	[('তোমার', 'PRP'), ('প্রতিটি', 'UND'), ('পদক্ষেপ', 'NN'), ('যেন', 'CC'), ('এক', 'UND'), ('নতুন', 'NN'), ('গল্পের', 'NN'), ('সূচনা', 'UND')]	Positive	Positive
মানুষ তার স্বপ্নের মতো বড়	[('মানুষ', 'NN'), ('তার', 'PRP'), ('স্বপ্নের', 'NN'), ('মতো', 'UND'), ('বড়', 'UND')]	Positive	Positive
পৃথিবীটা আমাদের মতো ছোট হয়ে এসেছে	[('পৃথিবীটা', 'NN'), ('আমাদের', 'PRP'), ('মতো', 'UND'), ('ছোট', 'UND'), ('হয়ে', 'UND'), ('এসেছে', 'VB')]	Neutral	Neutral
যে আলো জ্বলে, সে আলো নিভে যায়	[('যে', 'PRP'), ('আলো', 'NN'), ('জ্বলে,', 'UND'), ('সে', 'PRP'), ('আলো', 'NN'), ('নিভে', 'VB'), ('যায়', 'UND')]	Negative	Negative
সুখ খুঁজে পাওয়া যায়না, তাকে নির্মাণ করতে হয়	[('সুখ', 'NN'), ('খুঁজে', 'VB'), ('পাওয়া', 'UND'), ('যায়না,', 'UND'), ('তাকে', 'PRP'), ('নির্মাণ', 'NN'), ('করতে', 'VB'), ('হয়', 'UND')]	Positive	Positive
সময় আমাদের ছাড় দেয় না, তাই এগিয়ে যেতে হয়	[('সময়', 'NN'), ('আমাদের', 'PRP'), ('ছাড়', 'UND'), ('দেয়', 'UND'), ('না,', 'UND'), ('তাই', 'RB'), ('এগিয়ে', 'UND'), ('যেতে', 'UND'), ('হয়', 'UND')]	Negative	Negative
প্রকৃতির নিয়মেই সবকিছু বদলায়	[('প্রকৃতির', 'NN'), ('নিয়মেই', 'NN'), ('সবকিছু', 'UND'), ('বদলায়', 'VB')]	Positive	Positive
জীবনের মানে শুধুমাত্র বেঁচে থাকা নয়, সত্যিকারের বেঁচে থাকা	[('জীবনের', 'NN'), ('মানে', 'UND'), ('শুধুমাত্র', 'UND'), ('বেঁচে', 'UND'), ('থাকা', 'VB'), ('নয়,', 'UND'), ('সত্যিকারের', 'UND'), ('বেঁচে', 'UND'), ('থাকা', 'VB')]	Positive	Positive
প্রেমের থেকে বড় কোনো শক্তি নেই	[('প্রেমের', 'NN'), ('থেকে', 'UND'), ('বড়', 'UND'), ('কোনো', 'UND'), ('শক্তি', 'NN'), ('নেই', 'UND')]	Negative	Negative
আজকের দিনে রাজধানীতে বৃষ্টির সম্ভাবনা রয়েছে	[('আজকের', 'UND'), ('দিনে', 'UND'), ('রাজধানীতে', 'NN'), ('বৃষ্টির', 'NN'), ('সম্ভাবনা', 'NN'), ('রয়েছে', 'UND')]	Negative	Negative
নতুন অর্থনৈতিক নীতির ঘোষণা দিয়েছে সরকার	[('নতুন', 'NN'), ('অর্থনৈতিক', 'UND'), ('নীতির', 'NN'), ('ঘোষণা', 'UND'), ('দিয়েছে', 'UND'), ('সরকার', 'UND')]	Positive	Positive
পুঁজিবাজারে শেয়ারের মূল্য বাড়ছে	[('পুঁজিবাজারে', 'UND'), ('শেয়ারের', 'UND'), ('মূল্য', 'UND'), ('বাড়ছে', 'JJ')]	Positive	Positive
বিভিন্ন জেলায় পানির সঙ্কট বেড়ে চলেছে	[('বিভিন্ন', 'JJ'), ('জেলায়', 'UND'), ('পানির', 'UND'), ('সঙ্কট', 'UND'), ('বেড়ে', 'UND'), ('চলেছে', 'UND')]	Positive	Positive
বিশ্ব স্বাস্থ্য সংস্থার তথ্য মতে, স্বাস্থ্য সেবায় নতুন নিয়মাবলী আসতে চলেছে	[('বিশ্ব', 'NN'), ('স্বাস্থ্য', 'NN'), ('সংস্থার', 'NN'), ('তথ্য', 'NN'), ('মতে,', 'UND'), ('স্বাস্থ্য', 'NN'), ('সেবায়', 'UND'), ('নতুন', 'NN'), ('নিয়মাবলী', 'UND'), ('আসতে', 'VB'), ('চলেছে', 'UND')]	Positive	Positive
রাজধানীর যানজট সমস্যার সমাধানে সরকারের নতুন পদক্ষেপ	[('রাজধানীর', 'UND'), ('যানজট', 'NN'), ('সমস্যার', 'NN'), ('সমাধানে', 'UND'), ('সরকারের', 'NN'), ('নতুন', 'NN'), ('পদক্ষেপ', 'NN')]	Positive	Positive
শিক্ষা ব্যবস্থায় আধুনিক প্রযুক্তির ভূমিকা নিয়ে আলোচনা চলছে	[('শিক্ষা', 'NN'), ('ব্যবস্থায়', 'UND'), ('আধুনিক', 'JJ'), ('প্রযুক্তির', 'NN'), ('ভূমিকা', 'NN'), ('নিয়ে', 'UND'), ('আলোচনা', 'JJ'), ('চলছে', 'VB')]	Positive	Positive
বিভিন্ন স্থানে বন্যার কারণে কৃষির ক্ষতি হয়েছে	[('বিভিন্ন', 'JJ'), ('স্থানে', 'NN'), ('বন্যার', 'NN'), ('কারণে', 'UND'), ('কৃষির', 'NN'), ('ক্ষতি', 'NN'), ('হয়েছে', 'UND')]	Positive	Positive
তোমার চোখের সেই গভীরতা আমাকে এক অন্য জগতে নিয়ে যায়	[('তোমার', 'PRP'), ('চোখের', 'NN'), ('সেই', 'UND'), ('গভীরতা', 'NN'), ('আমাকে', 'PRP'), ('এক', 'UND'), ('অন্য', 'UND'), ('জগতে', 'NN'), ('নিয়ে', 'UND'), ('যায়', 'UND')]	Positive	Positive
স্বপ্নের পেছনে দৌড়ানোর সময় সময়ের কথা ভুলে যাওয়া ঠিক নয়	[('স্বপ্নের', 'NN'), ('পেছনে', 'UND'), ('দৌড়ানোর', 'UND'), ('সময়', 'NN'), ('সময়ের', 'UND'), ('কথা', 'NN'), ('ভুলে', 'VB'), ('যাওয়া', 'UND'), ('ঠিক', 'UND'), ('নয়', 'UND')]	Positive	Positive
বৃষ্টির প্রতিটি ফোঁটায় যেন একটি নতুন গল্প রয়েছে	[('বৃষ্টির', 'NN'), ('প্রতিটি', 'UND'), ('ফোঁটায়', 'UND'), ('যেন', 'CC'), ('একটি', 'PRP'), ('নতুন', 'NN'), ('গল্প', 'NN'), ('রয়েছে', 'UND')]	Positive	Positive
এক চিলতে হাসিতে লুকিয়ে থাকে কত আনন্দ	[('এক', 'UND'), ('চিলতে', 'UND'), ('হাসিতে', 'NN'), ('লুকিয়ে', 'UND'), ('থাকে', 'VB'), ('কত', 'UND'), ('আনন্দ', 'JJ')]	Positive	Positive
জীবনের গল্পগুলো কখনও কখনও আমাদের ভাবনার বাইরে চলে যায়	[('জীবনের', 'NN'), ('গল্পগুলো', 'NN'), ('কখনও', 'RB'), ('কখনও', 'RB'), ('আমাদের', 'PRP'), ('ভাবনার', 'NN'), ('বাইরে', 'UND'), ('চলে', 'VB'), ('যায়', 'UND')]	Negative	Negative
আকাশে উড়ে যাওয়া পাখির ডানায় যেন মুক্তির স্বাদ মেলে	[('আকাশে', 'NN'), ('উড়ে', 'UND'), ('যাওয়া', 'UND'), ('পাখির', 'NN'), ('ডানায়', 'UND'), ('যেন', 'CC'), ('মুক্তির', 'NN'), ('স্বাদ', 'NN'), ('মেলে', 'UND')]	Positive	Positive
পাহাড়ের চূড়ায় দাঁড়িয়ে পৃথিবীটাকে একবার দেখে নাও	[('পাহাড়ের', 'UND'), ('চূড়ায়', 'UND'), ('দাঁড়িয়ে', 'UND'), ('পৃথিবীটাকে', 'NN'), ('একবার', 'UND'), ('দেখে', 'UND'), ('নাও', 'UND')]	Positive	Positive
তোমার কণ্ঠের প্রতিটি শব্দ যেন এক নতুন সুরের মতো শোনায়	[('তোমার', 'PRP'), ('কণ্ঠের', 'NN'), ('প্রতিটি', 'UND'), ('শব্দ', 'NN'), ('যেন', 'CC'), ('এক', 'UND'), ('নতুন', 'NN'), ('সুরের', 'NN'), ('মতো', 'UND'), ('শোনায়', 'UND')]	Positive	Positive
